# Supplementary material for: Gut microbe-derived trimethylamine shapes circadian rhythms through the host receptor TAAR5
Source: eLife. 2026 Jan 29;14:RP107037. doi: 10.7554/eLife.107037 (PMC12854671; doi:10.7554/eLife.107037)
Supplement: Supplementary file 1. [file elife-107037-supp1.xlsx]

## Sheet: Sheet1
	Gene	Group	Zero Amplitude Test	MESOR	Amplitude	Acrophase	Mesor Test	Amplitude Test	Acrophase Comparison
Figure 1A: Skeletal Muscle Gene Expression	LacZ	Taar5 +/+	0.0182	4.754 ± 24.113	9.899 ± 33.683	14.295 ± 6.688	0.000285	0.0182	0.257748
		Taar5-/-	0.119	141.511 ± 34.834	251.811 ± 35.373	19.3 ± 0.327
	Bmal1	Taar5 +/+	0.0653	0.555 ± 0.062	0.796 ± 0.086	3.132 ± 0.368	0.258	0.83	0.160771
		Taar5-/-	0.0284	0.497 ± 0.089	0.735 ± 0.098	3.747 ± 0.36
	Nr1d1	Taar5 +/+	1.24e-07	0.553 ± 0.048	1.072 ± 0.066	4.301 ± 0.132	0.379	0.628	0.0027638
		Taar5-/-	6.09e-05	0.521 ± 0.069	0.961 ± 0.074	5.52 ± 0.153
	Per1	Taar5 +/+	6.67e-05	4.129 ± 0.987	7.785 ± 1.37	15.644 ± 0.388	0.338	0.653	0.210122
		Taar5-/-	0.0531	5.215 ± 1.426	10.66 ± 1.547	15.13 ± 0.252
	Per2	Taar5 +/+	0.000145	2.679 ± 0.198	4.415 ± 0.278	13.325 ± 0.161
		Taar5-/-	2.26e-07	2.708 ± 0.286	4.364 ± 0.285	12.193 ± 0.182	0.994	0.654	0.103242
Figure 1B: Olfactory Bulb Gene Expression	Bmal1	Taar5 +/+	0.126	1.167 ± 0.086	1.408 ± 0.117	16.412 ± 0.526
		Taar5-/-	0.0112	1.523 ± 0.127	2.027 ± 0.142	5.045 ± 0.249	0.00244	0.628	0.0856607
	Clock	Taar5 +/+	0.0271	1.332 ± 0.162	2.065 ± 0.226	15.18 ± 0.318
		Taar5-/-	0.556	1.883 ± 0.243	2.134 ± 0.274	16.571 ± 0.955	0.00977	0.313	0.0191623
	Nr1d1	Taar5 +/+	0.000123	0.556 ± 0.052	0.93 ± 0.072	3.843 ± 0.198
		Taar5-/-	0.0346	0.755 ± 0.077	0.984 ± 0.08	19.443 ± 0.364	0.0174	0.788	0.000510927
	Cry1	Taar5 +/+	0.927	1.372 ± 0.108	1.443 ± 0.15	3.94 ± 2.197
		Taar5-/-	0.001	1.104 ± 0.162	1.575 ± 0.162	23.233 ± 0.385	0.161	0.54	0.0151488
	Per2	Taar5 +/+	0.0414	0.829 ± 0.072	1.16 ± 0.1	5.245 ± 0.31
		Taar5-/-	0.0217	0.498 ± 0.107	0.697 ± 0.106	21.328 ± 0.61	0.0305	0.625	0.00765602
Figure 1C: Liver Gene Expression	Bmal1	Taar5 +/+	0.00581	0.519 ± 0.076	0.936 ± 0.102	0.695 ± 0.273
		Taar5-/-	0.00256	0.614 ± 0.112	1.006 ± 0.113	23.712 ± 0.304	0.984	0.646	0.0664288
	Cry1	Taar5 +/+	0.0115	0.471 ± 0.099	0.951 ± 0.132	0.7 ± 0.309
		Taar5-/-	0.0206	0.552 ± 0.143	0.945 ± 0.141	23.773 ± 0.391	0.967	0.63	0.119455
	Cry2	Taar5 +/+	0.352	0.877 ± 0.248	1.504 ± 0.351	3.887 ± 0.56
		Taar5-/-	0.472	0.88 ± 0.363	1.186 ± 0.361	23.798 ± 1.283	0.741	0.48	0.154069
	Per1	Taar5 +/+	0.00382	0.669 ± 0.051	0.909 ± 0.069	1.936 ± 0.313
		Taar5-/-	0.324	0.862 ± 0.074	0.999 ± 0.08	2.983 ± 0.541	0.123	0.531	0.0780732
	Per2	Taar5 +/+	0.028	0.602 ± 0.086	0.979 ± 0.116	0.775 ± 0.344
		Taar5-/-	0.012	0.594 ± 0.125	0.947 ± 0.121	23.21 ± 0.386	0.676	0.612	0.154196
Figure 1D: Gonadal White Adipose Tissue Gene Expression	Bmal1	Taar5 +/+	0.0501	0.957 ± 0.052	1.114 ± 0.076	22.091 ± 0.46
		Taar5-/-	0.00027	1 ± 0.078	1.468 ± 0.074	23.151 ± 0.197	0.746	0.0213	0.0213756
	Per1	Taar5 +/+	0.00153	2.093 ± 0.241	3.37 ± 0.35	11.239 ± 0.258
		Taar5-/-	0.996	2.825 ± 0.358	2.857 ± 0.331	9.766 ± 13.132	0.128	0.866	0.0655705
	Per2	Taar5 +/+	5.72e-05	3.044 ± 0.433	5.964 ± 0.629	11.171 ± 0.203
		Taar5-/-	0.374	3.164 ± 0.642	4.201 ± 0.612	11.167 ± 0.732	0.439	0.909	0.0332276
	Prdm16	Taar5 +/+	0.783	1.388 ± 0.321	1.609 ± 0.46	21.199 ± 2.018
		Taar5-/-	0.125	2.842 ± 0.476	4.218 ± 0.509	19.065 ± 0.373	0.0242	0.388	0.00688721
	Ucp1	Taar5 +/+	0.063	0.822 ± 0.048	1.003 ± 0.066	4.067 ± 0.385
		Taar5-/-	0.0715	0.733 ± 0.072	0.908 ± 0.082	2.154 ± 0.404	0.115	0.964	0.338785
Figure 1: FS1: Body Weight	Body Weight (g)	Taar5 +/+	0.768	27.721 ± 0.439	28.28 ± 0.619	23.314 ± 1.114
		Taar5-/-	0.976	28.602 ± 0.65	28.694 ± 0.709	2.096 ± 7.14	0.191	0.685	0.475668
Figure 1: FS2A: Circulating Metabolites	Plasma Choline	Taar5 +/+	0.049	36.34 ± 1.937	43.346 ± 2.69	15.649 ± 0.397
		Taar5-/-	0.125	39.974 ± 2.855	47.106 ± 3.279	16.001 ± 0.383	0.363	0.933	0.128498
	Plasma L-Carnitine	Taar5 +/+	0.853	24.784 ± 0.781	25.398 ± 1.085	13.785 ± 1.832
		Taar5-/-	0.806	26.771 ± 1.17	27.576 ± 1.242	13.292 ± 1.563	0.0977	0.77	0.539708
	Plasma γ-Butyrobetaine	Taar5 +/+	0.502	0.49 ± 0.029	0.53 ± 0.04	15.429 ± 1.027
		Taar5-/-	0.976	0.528 ± 0.043	0.539 ± 0.045	7.077 ± 4.027	0.63	0.786	6.69526e-07
	Plasma TMA	Taar5 +/+	0.0533	43.982 ± 3.752	54.949 ± 5.213	16.683 ± 0.491
		Taar5-/-	0.0473	48.983 ± 5.53	67.433 ± 5.893	18.815 ± 0.314	0.446	0.555	0.111479
	Plasma TMAO	Taar5 +/+	0.826	4.139 ± 0.293	4.409 ± 0.41	14.115 ± 1.549
		Taar5-/-	0.219	4.124 ± 0.446	4.88 ± 0.454	21.652 ± 0.657	0.924	0.691	0.346061
Figure 1: FS2B: Circulating Hormones & Cytokines	Plasma Insulin	Taar5 +/+	0.63	247.888 ± 17.712	272.029 ± 24.564	1.842 ± 1.057
		Taar5-/-	0.197	276.739 ± 26.221	331.367 ± 29.375	16.634 ± 0.47	0.286	0.72	0.267172
	Plasma C-Peptide	Taar5 +/+	0.71	22.174 ± 11.509	36.075 ± 16.111	0.055 ± 1.183
		Taar5-/-	0.478	14.894 ± 17.249	36.615 ± 18.463	18.571 ± 0.831	0.632	0.996	0.446548
	Plasma Glucagon	Taar5 +/+	0.0553	17.512 ± 2.422	23.735 ± 3.481	9.044 ± 0.541
		Taar5-/-	0.0432	20.612 ± 3.585	32.869 ± 3.499	10.213 ± 0.329	0.0805	0.259	0.0326512
	Plasma Active GLP-1	Taar5 +/+	0.34	0.119 ± 0.015	0.157 ± 0.022	8.987 ± 0.56
		Taar5-/-	0.24	0.1 ± 0.022	0.135 ± 0.025	4.915 ± 0.642	0.527	0.89	2.74313e-05
	Plasma Leptin	Taar5 +/+	0.939	3758.578 ± 368.525	3912.379 ± 520.425	23.143 ± 3.393
		Taar5-/-	0.579	4704.115 ± 545.559	5435.666 ± 593.184	13.953 ± 0.758	0.0379	0.731	0.52942
	Plasma Ghrelin	Taar5 +/+	0.0387	4.127 ± 2.019	10.62 ± 2.855	10.977 ± 0.44
		Taar5-/-	0.643	3.689 ± 3.025	7.185 ± 3.102	23.721 ± 0.944	0.926	0.646	0.213422
	Plasma PYY	Taar5 +/+	0.541	99.806 ± 6.392	111.17 ± 9.13	6.039 ± 0.788
		Taar5-/-	0.343	87.449 ± 9.463	99.271 ± 9.243	21.654 ± 0.899	0.442	0.712	0.328867
	Plasma MCP-1	Taar5 +/+	0.0348	17.669 ± 3.13	28.406 ± 4.473	21.887 ± 0.408
		Taar5-/-	0.0092	24.668 ± 4.633	43.882 ± 4.805	0.609 ± 0.257	0.339	0.661	0.0102843
	Plasma IL-6	Taar5 +/+	0.0372	14.572 ± 4.767	30.045 ± 6.839	21.367 ± 0.429
		Taar5-/-	0.0199	22.187 ± 7.057	49.695 ± 7.476	1.179 ± 0.268	0.448	0.688	0.0854325
	Plasma TNFα	Taar5 +/+	0.0332	4.554 ± 0.25	5.526 ± 0.349	3.684 ± 0.368
		Taar5-/-	0.00459	4.898 ± 0.37	6.47 ± 0.405	2.231 ± 0.237	0.243	0.484	0.0387568
Figure 3: FS1: Gut-Microbial Oscillations	Lachnospiraceae UCG-002	Taar5 +/+	0.597	0.006 ± 0.002	0.008 ± 0.002	17.331 ± 1.392
		Taar5-/-	0.0835	0.008 ± 0.002	0.015 ± 0.002	23.636 ± 0.37	0.817	0.695	7.66992e-15
	Lachnospiraceae UCG-006	Taar5 +/+	0.0137	0.002 ± 0	0.004 ± 0.001	18.976 ± 0.324
		Taar5-/-	0.636	0.002 ± 0.001	0.002 ± 0.001	17.578 ± 0.899	0.984	0.501	5.82972e-14
	Lachnospiraceae NK4A136	Taar5 +/+	0.33	0.151 ± 0.013	0.18 ± 0.018	17.153 ± 0.656
		Taar5-/-	0.0113	0.177 ± 0.019	0.237 ± 0.019	20.216 ± 0.349	0.409	0.561	2.4325e-05
	Lactobacillus	Taar5 +/+	0.0433	0.047 ± 0.005	0.065 ± 0.007	5.41 ± 0.414
		Taar5-/-	0.595	0.042 ± 0.008	0.052 ± 0.009	4.807 ± 0.803	0.153	0.831	0.513884
	Desulfovibrio	Taar5 +/+	0.362	0.017 ± 0.001	0.02 ± 0.002	5.011 ± 0.629
		Taar5-/-	0.206	0.02 ± 0.002	0.022 ± 0.002	8.832 ± 0.802	0.225	0.914	8.89207e-13
	Bacteroides	Taar5 +/+	0.127	0.003 ± 0.001	0.005 ± 0.001	12.204 ± 0.658
		Taar5-/-	0.15	0.005 ± 0.001	0.008 ± 0.001	17.39 ± 0.35	0.0812	0.338	1.79517e-15
	Dubosiella	Taar5 +/+	0.0175	0.024 ± 0.006	0.04 ± 0.008	3.971 ± 0.538
		Taar5-/-	0.64	0.043 ± 0.009	0.054 ± 0.009	20.383 ± 0.88	0.0371	0.341	1.0915e-07
	Faecalibaculum	Taar5 +/+	0.104	0.435 ± 0.021	0.494 ± 0.029	5.808 ± 0.517
		Taar5-/-	0.0203	0.374 ± 0.031	0.484 ± 0.032	7.548 ± 0.303	0.128	0.47	0.00496567
	Colidextribacter	Taar5 +/+	0.204	0.009 ± 0.001	0.01 ± 0.001	0.165 ± 0.725
		Taar5-/-	0.178	0.009 ± 0.001	0.011 ± 0.001	21.769 ± 0.47	0.577	0.524	7.45591e-16
	Odoribacter	Taar5 +/+	0.348	0.003 ± 0	0.004 ± 0.001	18.339 ± 0.939
		Taar5-/-	0.271	0.004 ± 0.001	0.005 ± 0.001	14.39 ± 0.436	0.329	0.773	1.18255e-13
	Butyricicoccus	Taar5 +/+	0.0502	0.001 ± 0	0.002 ± 0	17.635 ± 0.403
		Taar5-/-	0.812	0.001 ± 0	0.002 ± 0	2.352 ± 1.401	0.594	0.672	4.77886e-16
	Alistipes	Taar5 +/+	0.571	0.012 ± 0.001	0.014 ± 0.001	17.299 ± 0.909
		Taar5-/-	0.0121	0.015 ± 0.002	0.02 ± 0.002	17.706 ± 0.309	0.123	0.338	1.29903e-09
	Turicibacter	Taar5 +/+	0.0453	0.02 ± 0.003	0.03 ± 0.004	12.019 ± 0.382
		Taar5-/-	0.336	0.025 ± 0.004	0.032 ± 0.004	13.386 ± 0.609	0.157	0.719	7.78923e-10
	Muribaculum	Taar5 +/+	0.00526	0.015 ± 0.001	0.019 ± 0.001	8.483 ± 0.3
		Taar5-/-	0.665	0.018 ± 0.001	0.019 ± 0.001	13.769 ± 0.91	0.0495	0.529	2.36579e-14
	Coriobacteriaceae UCG-002	Taar5 +/+	0.151	0.001 ± 0	0.001 ± 0	17.27 ± 0.423
		Taar5-/-	0.123	0 ± 0	0.001 ± 0	9.186 ± 0.877	0.281	0.611	1.44895e-16
	Acetatifactor	Taar5 +/+	0.319	0 ± 0	0 ± 0	21.763 ± 0.938
		Taar5-/-	0.0192	0.001 ± 0	0.002 ± 0	12.15 ± 0.259	0.01	0.0833	4.01833e-17
	A2	Taar5 +/+	0.679	0.003 ± 0.001	0.004 ± 0.001	21.902 ± 1.096
		Taar5-/-	0.548	0.005 ± 0.001	0.006 ± 0.001	17.624 ± 0.794	0.0563	0.803	6.73994e-10
	Helicobacter	Taar5 +/+	0.0317	0.108 ± 0.009	0.144 ± 0.012	19.101 ± 0.34
		Taar5-/-	0.141	0.117 ± 0.013	0.143 ± 0.013	20.176 ± 0.539	0.514	0.905	5.81e-06
	Parabacteroides	Taar5 +/+	0.059	0.005 ± 0.001	0.007 ± 0.001	18.585 ± 0.551
		Taar5-/-	0.264	0.005 ± 0.001	0.008 ± 0.001	23.917 ± 0.491	0.554	0.422	1.17618e-15
	Anaerotruncus	Taar5 +/+	0.875	0.001 ± 0	0.001 ± 0	20.55 ± 1.74
		Taar5-/-	0.0218	0.001 ± 0	0.002 ± 0	16.818 ± 0.302	0.881	0.483	2.76248e-18
Figure 4A: Circulating Metabolites	Plasma Choline	WT-CutC	0.00524	48.996 ± 1.613	59.468 ± 2.293	13.545 ± 0.217
		ΔCutC	4.47e-07	38.449 ± 2.182	49.649 ± 2.079	13.901 ± 0.186	0.00146	0.774	0.00961969
	Plasma L-Carnitine	WT-CutC	0.397	37.502 ± 1.209	39.803 ± 1.709	7.059 ± 0.743
		ΔCutC	0.00791	39.771 ± 1.636	45.211 ± 1.558	13.95 ± 0.286	0.391	0.399	0.0781192
	Plasma Betaine	WT-CutC	0.0179	147.098 ± 7.387	177.373 ± 10.633	16.69 ± 0.339
		ΔCutC	0.0316	135.295 ± 9.995	163.756 ± 9.522	16.348 ± 0.335	0.236	0.96	0.0308364
	Plasma γ-Butyrobetaine	WT-CutC	0.000838	1.605 ± 0.073	2.062 ± 0.102	23.336 ± 0.229
		ΔCutC	0.0128	1.66 ± 0.099	1.959 ± 0.094	21.842 ± 0.314	0.675	0.408	0.00852059
	Plasma TMA	WT-CutC	0.0141	2.315 ± 0.217	3.654 ± 0.312	17.405 ± 0.226
		ΔCutC	0.203	0.984 ± 0.294	1.298 ± 0.28	2.228 ± 0.894	0.00148	0.321	0.00775532
	Plasma TMAO	WT-CutC	0.00891	9.425 ± 0.694	14.543 ± 1	15.901 ± 0.188
		ΔCutC	0.00378	0.378 ± 0.939	0.584 ± 0.894	19.563 ± 4.339	7.05e-10	0.0904	1.65515e-05
Figure 4B: Olfactory Bulb Gene Expression	Bmal1	WT-CutC	1.29e-05	0.655 ± 0.12	1.076 ± 0.169	23.101 ± 0.401
		ΔCutC	0.00129	0.951 ± 0.16	1.759 ± 0.151	0.492 ± 0.187	0.128	0.548	0.0193734
	Clock	WT-CutC	0.0592	0.827 ± 0.124	1.214 ± 0.177	2.015 ± 0.447
		ΔCutC	0.0065	0.766 ± 0.167	1.377 ± 0.159	4.265 ± 0.261	0.689	0.655	0.0306659
	Nr1d1	WT-CutC	0.19	0.998 ± 0.232	1.484 ± 0.325	8.312 ± 0.684
		ΔCutC	0.0422	1.294 ± 0.315	2.208 ± 0.3	3.218 ± 0.328	0.461	0.635	0.164253
	Cry1	WT-CutC	0.157	0.49 ± 0.28	0.761 ± 0.391	23.237 ± 1.484
		ΔCutC	0.0382	1.105 ± 0.38	2.393 ± 0.362	2.249 ± 0.281	0.152	0.521	0.169726
	Per1	WT-CutC	0.75	1.42 ± 0.203	1.657 ± 0.292	15.948 ± 1.188
		ΔCutC	0.286	1.283 ± 0.274	1.684 ± 0.261	19.535 ± 0.652	0.431	0.779	0.226521
	Per2	WT-CutC	0.706	1.095 ± 0.49	1.588 ± 0.679	10.038 ± 1.435
		ΔCutC	0.0656	1.594 ± 0.663	3.301 ± 0.632	1.821 ± 0.37	0.552	0.424	0.164548
Figure 4C: Circulating Hormones & Cytokines	Plasma Insulin	WT-CutC	0.0653	2855.806 ± 256.148	3745.034 ± 366.205	14.161 ± 0.403
		ΔCutC	0.0602	2771.925 ± 349.484	3634.451 ± 337.861	15.525 ± 0.388	0.983	0.889	0.043443
	Plasma Active GLP-1	WT-CutC	0.0155	0.076 ± 0.01	0.135 ± 0.014	16.858 ± 0.234
		ΔCutC	0.1	0.044 ± 0.014	0.063 ± 0.013	15.187 ± 0.685	0.000963	0.456	1.2259e-05
	Plasma Leptin	WT-CutC	0.534	25.035 ± 2.737	30.766 ± 3.944	15.842 ± 0.662
		ΔCutC	0.00082	21.468 ± 3.734	32.134 ± 3.61	15.542 ± 0.335	0.53	0.447	0.0312276
	Plasma IL-1β	WT-CutC	0.563	0.162 ± 0.027	0.205 ± 0.038	22.624 ± 0.88
		ΔCutC	0.195	0.145 ± 0.037	0.217 ± 0.039	17.696 ± 0.464	0.65	0.898	0.000558747
	Plasma IL-2	WT-CutC	0.00421	1.342 ± 0.102	1.936 ± 0.141	4.542 ± 0.25
		ΔCutC	0.000582	1.562 ± 0.145	2.245 ± 0.152	7.478 ± 0.202	0.0945	0.814	2.44797e-05
	Plasma IL-33	WT-CutC	0.00421	1.675 ± 0.128	2.417 ± 0.176	4.542 ± 0.25
		ΔCutC	0.000582	1.95 ± 0.181	2.802 ± 0.19	7.478 ± 0.202	0.0945	0.814	3.06025e-05
Figure 4: FS1: Gut-Microbial Oscillations	C. sporogenes	WT-CutC	0.0426	11207.569 ± 1203.539	16210.557 ± 1734.346	15.823 ± 0.334
		ΔCutC	0.191	11870.76 ± 1642.087	14613.721 ± 1553.3	4.704 ± 0.585	0.745	0.615	0.0993241
	B. theta	WT-CutC	0.0402	6627371.809 ± 539206.187	9170588.869 ± 776361.623	15.395 ± 0.294
		ΔCutC	0.777	6231828.204 ± 735683.26	6635937.065 ± 713176.544	0.156 ± 1.738	0.376	0.376	0.185144
	B. caccae	WT-CutC	0.0252	2376257.403 ± 184646.029	3267446.417 ± 266090.328	15.862 ± 0.287
		ΔCutC	0.514	2206196.864 ± 251927.734	2453122.904 ± 242269.927	1.047 ± 0.982	0.323	0.442	0.164399
	B. ovatus	WT-CutC	0.0401	176638.846 ± 13904.713	241069.256 ± 20033.622	15.68 ± 0.299
		ΔCutC	0.637	164003.694 ± 18971.341	178418.111 ± 18317.846	0.612 ± 1.262	0.331	0.421	0.186743
	C. aerofaciens	WT-CutC	0.279	95.96 ± 9.973	124.552 ± 14.366	16.401 ± 0.484
		ΔCutC	0.803	75.142 ± 13.607	81.998 ± 13.201	7.939 ± 1.893	0.167	0.48	0.122103
Figure 4: FS2A: Brown Adipose Tissue Gene Expression	Bmal1	WT-CutC	0.18	1.653 ± 0.958	2.44 ± 1.37	2.207 ± 1.703
		ΔCutC	0.103	3.207 ± 1.296	6.833 ± 1.235	22.489 ± 0.341	0.239	0.326	0.176093
	Cry1	WT-CutC	0.0633	5.132 ± 1.197	9.024 ± 1.694	6.937 ± 0.435
		ΔCutC	0.866	5.491 ± 1.62	6.374 ± 1.543	16.558 ± 1.749	0.91	0.375	0.131754
	Per2	WT-CutC	0.058	2.436 ± 0.668	4.608 ± 0.962	4.858 ± 0.428
		ΔCutC	0.202	2.885 ± 0.904	4.606 ± 0.862	23.517 ± 0.5	0.67	0.799	0.0841651
	Pemt	WT-CutC	0.0635	2.222 ± 0.436	4.201 ± 0.622	6.133 ± 0.309
		ΔCutC	0.758	1.925 ± 0.595	2.225 ± 0.581	8.928 ± 1.881	0.409	0.246	0.00112021
	Pdk4	WT-CutC	0.0382	0.747 ± 0.227	1.118 ± 0.321	0.763 ± 0.867
		ΔCutC	0.539	1.156 ± 0.31	1.587 ± 0.294	2.611 ± 0.701	0.283	0.945	0.394167
Figure 4: FS2B: Gut Microbe-Derived Metabolites	Plasma Hippuric Acid	WT-CutC	0.0281	18.787 ± 0.579	22.187 ± 0.834	3.601 ± 0.236
		ΔCutC	0.00606	2.619 ± 0.784	3.83 ± 0.747	17.698 ± 0.617	7.06e-08	0.282	0.10666
	Plasma Indole-3-Propionic Acid	WT-CutC	1.79e-05	14.418 ± 0.371	18.964 ± 0.518	11.514 ± 0.117
		ΔCutC	0.0644	2.319 ± 0.503	2.757 ± 0.479	5.969 ± 1.093	1.19e-08	0.0011	3.58101e-05
	Plasma Indole Acetic Acid	WT-CutC	0.00148	0.903 ± 0.052	1.145 ± 0.073	12.622 ± 0.306
		ΔCutC	0.0394	0.853 ± 0.071	1.062 ± 0.067	9.908 ± 0.322	0.208	0.901	0.00186411
	Plasma Phenylacetic Acid	WT-CutC	0.151	1.224 ± 0.149	1.49 ± 0.213	5.923 ± 0.783
		ΔCutC	1.06e-05	2.654 ± 0.202	4.068 ± 0.192	8.438 ± 0.136	4.15e-06	0.0235	0.00405078
	Plasma Phenylacetylglycine	WT-CutC	0.00627	0.913 ± 0.166	1.388 ± 0.238	5.47 ± 0.488
		ΔCutC	6.54e-05	2.573 ± 0.225	3.992 ± 0.214	7.993 ± 0.151	7.37e-06	0.182	6.90764e-05
